# Supplementary material for: Morphological diversity of Western Balkan durum wheat landraces
Source: PeerJ. 2025 Sep 19;13:e20068. doi: 10.7717/peerj.20068 (PMC12452949; doi:10.7717/peerj.20068)
Supplement: Supplemental Information 1 [file peerj-13-20068-s001.xlsx]

## Sheet: Table S1
Supplementary Table 1. Montenegrin autochthonous landraces of tetraploid wheat
No	Landrace code	Common name	Origin site	Latitude	Longitude	Аltitude (m a.s.l)	No of morphologically distinct genotypes	Köppen–Geiger climate classification*
1	METD-1	Rogosija with white ears and awns (Rogosija sa bijelim klasom i osjem)	Spinja	42°21'7.47"N	19°22'18.57"E	167	3	Cfa
2	METD-2	Rogosija with white ears and awns (Rogosija sa bijelim klasom i osjem)	Vuksanlekići	42°20'44.13"N	19°20'11.29"E	32	4	Cfa
3	METD-3	Rogosija with white awns (Rogosija sa bijelim osjem)	Spinja	42°21'6.33"N	19°22'21.48"E	180	6	Cfa
4	METD-4	Rogosija with white ears and dark awns (Rogosija sa bijelim klasom i mrkim osjem)	Sukobin	42°0'39.64"N	19°21'40.76"E	9	5	Csa
5	METD-5	Rogosija with white ears and dark awns (Rogosija sa bijelim klasom i mrkim osjem)	Spinja	42°21'3.48"N	19°22'28.76"E	187	8	Cfa
6	METD-6	Rogosija with white ears and awns (Rogosija sa bijelim klasom i osjem)	Golubovci	42°20'4.00"N	19°13'37.57"E	10	4	Csa
7	METD-7	Rogosija with white ears and awns (Rogosija sa bijelim klasom i osjem)	Zeta	42°17'39.70"N	19°11'2.46"E	9	3	Csa
8	METD-8	Rogosija with white awns (Rogosija sa bijelim osjem)	Spinja	42°21'6.33"N	19°22'21.48"E	168	1	Cfa
9	METD-9	Rogosija with red ears and awns (Rogosija sa crvenim klasom i osjem)	Spinja	42°21'2.05"N	19°22'15.32"E	159	6	Cfa
10	METD-10	Rogosija with white ears and awns (Rogosija sa bijelim klasom i osjem)	Buronji	42°25'46.99"N	19°6'7.75"E	369	3	Cfa
11	METD-11	Rogosija with red ears and awns (Rogosija sa crvenim klasom i osjem)	Klezna	41°59'13.59"N	19°16'51.07"E	18	7	Csa
12	METD-12	Rogosija with white ears and dark awns (Rogosija sa bijelim klasom i mrkim osjem)	Sotonići	42°13'54.55"N	19°2'55.50"E	143	3	Cfa
13	METD-13	Rogosija with white ears and awns (Rogosija sa bijelim klasom i osjem)	Kokoti	42°24'0.61"N	19°12'0.10"E	144	6	Cfa
14	METD-14	Rogosija with white ears and awns (Rogosija sa bijelim klasom i osjem)	Ubli	42°29'24.06"N	19°23'45.99"E	471	3	Cfa
15	METD-15	Grbljanka with red ears and awns (Grbljanka sa crvenim klasom i osjem)	Mrkojevići	42°0'5.58"N	19°11'45.26"E	210	11	Csa
16	METD-16	Rogosija with yellow ears and dark awns (Rogosija sa žutim klasom i mrkim osjem)	Karanikići	42°11'11.72"N	19°10'23.71"E	398	6	Csa
17	METD-17	Grbljanka with red ears and awns (Grbljanka sa crvenim klasom i osjem)	Kamenički most	42°1'18.53"N	19°13'17.77"E	205	4	Csa
18	METD-18	Rogosija with white ears and dark awns (Rogosija sa bijelim klasom i mrkim osjem)	Brajići	42°18'21.07"N	18°53'45.21"E	798	4	Cfb
19	METD-19	Rogosija with white ears and black awns (Rogosija sa bijelim klasom i crnim osjem)	Gornja Seoca	42°12'48.06"N	19°7'58.26"E	214	3	Csa
20	METD-20	Rogosija with white ears and dark awns (Rogosija sa bijelim klasom i mrkim osjem)	Tejani	42°6'10.66"N	19°14'39.28"E	488	9	Csa
21	METD-21	Rogosija with brown awns (Rogosija sa smeđim osjem)	Vuksanlekići	42°19'52.62"N	19°20'22.26"E	22	5	Cfa
22	METD-22	Rogosija with yellow awns (Rogosija sa žutim osjem)	Vuksanlekići	42°20'8.96"N	19°19'48.75"E	25	1	Cfa
23	METD-23	Rogosija from Šestana–Krajina (Rogosija iz Šestana–Krajina)	Šestani	42°11'2.97"N	19°11'4.89"E	251	3	Csa
24	METD-24	Rogosija with white ears and black awns (Rogosija sa bijelim klasom i crnim osjem)	Karanikići	42°10'57.80"N	19°10'25.81"E	401	8	Csa
25	METD-25	Rogosija with white ears and awns (Rogosija sa bijelim klasom i osjem)	Čurčići	42°35'55.53"N	19°0'10.65"E	505	9	Cfa
26	METD-26	Grbljanka with red ears and awns (Grbljanka sa crvenim klasom i osjem)	Kamenički most	42°1'23.47"N	19°13'13.52"E	207	6	Csa
27	METD-27	Rogosija with yellow ears and awns (Rogosija sa žutim klasom i osjem)	Čukovići	42°18'23.81"N	19°3'6.51"E	12	2	Cfa
28	METD-28	Rogosija with brown awns and white ears (Rogosija sa smeđim osjem i bijelim klasom)	Martinići	42°32'3.43"N	19°10'59.29"E	66	8	Cfa
29	METD-29	Rogosija with white ears and awns (Rogosija sa bijelim klasom i osjem)	Golubovci	42°20'17.72"N	19°13'1.20"E	10	1	Csa
30	METD-30	Rogosija with white ears and dark awns (Rogosija sa bijelim klasom i mrkim osjem)	Zeta	42°19'4.50"N	19°14'40.30"E	9	6	Csa
31	METD-31	Rogosija with white ears and dark awns (Rogosija sa bijelim klasom i mrkim osjem)	Šestani	42°11'5.49"N	19°11'9.20"E	233	6	Csa
32	METD-32	Rogosija with white ears and dark awns (Rogosija sa bijelim klasom i mrkim osjem)	Livari	42°7'48.61"N	19°13'1.63"E	460	5	Csa
33	METD-33	Rogosija with yellow ears and awns (Rogosija sa žutim klasom i osjem)	Tejani	42°6'24.70"N	19°14'20.32"E	485	5	Csa
34	METD-34	Rogosija with white ears and awns (Rogosija sa bijelim klasom i osjem)	Bečići	42°16'57.79"N	18°52'11.62"E	32	5	Csa
35	METD-35	Rogosija with white ears and brown or white awns (Rogosija sa bijelim klasom i mrkim ili bijelim osjem)	Ubli	42°29'28.79"N	19°23'50.70"E	470	4	Cfa
36	METD-36	Rogosija with white ears and awns (Rogosija sa bijelim klasom i osjem)	Kokoti	42°24'9.24"N	19°11'48.66"E	25	2	Cfa
37	METD-37	Rogosija with brown ears and awns (Rogosija sa smeđim klasom i osjem)	Bojke	42°2'22.61"N	19°17'14.27"E	365	8	Csa
38	METD-38	Rogosija with brown ears and dark awns (Rogosija sa smeđim klasom i mrkim osjem)	Dobra Voda	42°2'15.35"N	19°9'15.55"E	127	6	Csa
39	METD-39	Rogosija with brown ears and awns (Rogosija sa smeđim klasom i osjem)	Bojke	42°2'16.16"N	19°17'1.06"E	305	4	Csa
40	METD-40	Rogosija with reddish ears (Rogosija sa crvenkastim klasom)	Krute	42°0'50.49"N	19°15'30.67"E	121	4	Csa
41	METD-41	Rogosija with brown awns (Rogosija sa smeđim osjem)	Mide	42°2'16.30"N	19°15'37.99"E	376	4	Csa
42	METD-42	Rogosija with yellow ears and dark awns (Rogosija sa žutim klasom i mrkim osjem)	Bar	42°6'9.36"N	19°5'44.86"E	6	10	Csa
43	METD-43	Rogosija with red ears and dark awns (Rogosija sa crvenim klasom i mrkim osjem)	Tuđemili	42°8'3.40"N	19°8'35.44"E	341	8	Csa
44	METD-44	Rogosija with red ears and awns (Rogosija sa crvenim klasom i osjem)	Pečurice	42°1'43.69"N	19°10'23.88"E	164	6	Csa
45	METD-45	Rogosija with white ears and black awns (Rogosija sa bijelim klasom i crnim osjem)	Krute	42°0'58.46"N	19°15'10.04"E	149	6	Csa
46	METD-46	Rogosija with red ears and awns (Rogosija sa crvenim klasom i osjem)	Mrkojevićko polje	41°59'38.78"N	19°13'1.39"E	240	5	Csa
47	METD-47	Rogosija with dark ears and awns (Rogosija sa mrkim klasom i osjem)	Dobra Voda	42°2'10.22"N	19°8'58.97"E	60	6	Csa
48	METD-48	Rogosija with dark awns (Rogosija sa mrkim osjem)	Sustaš	42°6'39.02"N	19°7'5.45"E	161	4	Csa
49	METD-49	Rogosija with reddish ears and awns (Rogosija sa crvenkastim klasom i osjem)	Between Spinje and Skoraca	42°21'32.74"N	19°22'46.35"E	274	7	Cfa
50	METD-50	Rogosija with brown awns (Rogosija sa smeđim osjem)	Police	42°53'48.82"N	19°54'39.42"E	836	7	Dfb
51	METD-51	Rogosija with brown ears (Rogosija sa smeđim klasom)	Cijevna	42°25'47.76"N	19°28'38.18"E	161	1	Csa
52	METD-52	Rogosija with white ears and dark awns (Rogosija sa bijelim klasom i mrkim osjem)	Cijevna	42°25'52.05"N	19°28'19.34"E	164	2	Csa
53	METD-53	Rogosija with red ears and awns (Rogosija sa crvenim klasom i osjem)	Tuzi	42°21'48.37"N	19°19'59.78"E	45	5	Cfa
54	METD-54	Rogosija with brown ears and awns (Rogosija sa smeđim klasom i osjem)	around Trebinje	42°42'24.94"N	18°18'46.94"E	269	1	Csa
55	METD-55	Rogosija with red ears and awns (Rogosija sa crvenim klasom i osjem)	around Trebinje	42°41'49.70"N	18°20'5.94"E	269	4	Csa
56	METD-56	Rogosija with red ears and awns (Rogosija sa crvenim klasom i osjem)	Trebinje	42°42'51.97"N	18°21'34.49"E	274	1	Csa
57	METD-57	Rogosija with brown ears and dark awns (Rogosija sa smeđim i mrkim osjem)	Kotezi	42°54'7.96"N	17°59'46.45"E	239	5	Csa
58	METD-58	Rogosija with white ears (Rogosija sa bijelim klasom)	Trebinje	42°42'19.07"N	18°20'4.57"E	269	10	Csa
59	METD-59	Rogosija with brown ears and awns (Rogosija sa smeđim klasom i osjem)	Luge	42°40'53.98"N	18°19'0.34"E	267	8	Csa
60	METD-60	Rogosija with brown awns (Rogosija sa smeđim osjem)	Trebinjsko polje	42°40'26.56"N	18°19'46.33"E	173	3	Csa
61	METD-61	Rogosija with brown ears and awns (Rogosija sa smeđim klasom i osjem)	Luge	42°41'17.89"N	18°18'37.26"E	269	1	Csa
62	METD-62	Rogosija with dark awns (Rogosija sa mrkim osjem)	Luge	42°42'1.15"N	18°18'42.58"E	268	3	Csa
63	METD-63	Rogosija with dark awns (Rogosija sa mrkim osjem)	Luge	42°41'40.31"N	18°18'46.48"E	269	2	Csa
64	METD-64	Velja wheat with red ears and awns (Velja pšenica sa crvenim klasom i osjem)	Vodica near Trebinje	42°41'47.03"N	18°20'42.11"E	271	4	Csa
65	METD-65	Rogosija with brown ears and awns (Rogosija sa smeđim klasom i osjem)	Podkraj	42°37'54.33"N	18°23'39.14"E	669	8	Csb
66	METD-66	Rogosija with red ears and awns (Rogosija sa crvenim klasom i osjem)	Grab	42°36'20.94"N	18°25'28.56"E	671	4	Cfb
67	METD-67	Reogosija with white awns (Rogosija sa bijelim osjem)	Dabar	43°6'16.56"N	18°7'53.08"E	534	7	Csa
68	METD-68	Reogosija with white awns (Rogosija sa bijelim osjem)	Grab	42°36'33.94"N	18°25'14.54"E	668	6	Cfb
69	METD-69	Rogosija with brown ears and awns (Rogosija sa smeđim klasom i osjem)	Dubrovka, Herceg Novi	42°27'16.54"N	18°32'35.21"E	55	2	Csa
70	METD-70	Rogosija with brown awns (Rogosija sa smeđim osjem)	Kraj	42°38'1.47"N	18°23'28.00"E	662	6	Csb
71	METD-71	Rogosija with yellow ears (Rogosija sa žutim klasom)	Kotezi	42°54'34.36"N	17°59'15.59"E	239	5	Csa
72	METD-72	Rogosija with dark awns (Rogosija sa mrkim osjem)	Konavle	42°32'8.72"N	18°19'35.46"E	46	10	Csa
73	METD-73	Rogosija with brown ears and awns (Rogosija sa smeđim klasom i osjem)	Tuli	42°38'56.84"N	18°22'41.37"E	635	2	Csb
74	METD-74	Rogosija with white ears and awns (Rogosija sa bijelim klasom i osjem)	Dolja– Dubrovnik	42°39'55.05"N	18°8'9.25"E	4	2	Csa
75	METD-75	Rogosija with red ears (Rogosija sa crvenim klasom)	Donji Grbalj	42°19'2.64"N	18°47'15.57"E	16	7	Cfa
76	METD-76	Rogosija with brown ears (Rogosija sa smeđim klasom)	Grab	42°36'27.42"N	18°25'1.33"E	671	2	Cfb
77	METD-77	Rogosija with brown ears and awns (Rogosija sa smeđim klasom i osjem)	Trebinje	42°42'56.06"N	18°20'56.92"E	273	2	Csa
78	METD-78	Rogosija with white ears (Rogosija sa bijelim klasom)	Donji Grbalj	42°18'33.32"N	18°48'3.46"E	15	3	Cfb
79	METD-79	Rogosija with brown ears (Rogosija sa smeđim klasom)	Fatnica–Stolac	43°1'41.96"N	18°18'51.82"E	477	9	Cfa
80	METD-80	Rogosija with brown ears (Rogosija sa smeđim klasom)	Zakovo	42°48'22.71"N	18°8'8.03"E	275	4	Csa
*Cfa = Humid subtropical climate; coldest month averaging above 0 °C (or −3 °C), at least one month's average temperature above 22 °C, and at least four months averaging above 10 °C. No significant precipitation difference between seasons.
Cfb = Temperate oceanic climate or subtropical highland climate; coldest month averaging above 0 °C (or −3 °C), all months with average temperatures below 22 °C, and at least four months averaging above 10 °C. No significant precipitation difference between seasons.
Csa = Hot-summer Mediterranean climate; coldest month averaging above 0 °C (or −3 °C), at least one month's average temperature above 22 °C, and at least four months averaging above 10 °C. At least three times as much precipitation in the wettest month of winter as in the driest month of summer, and the driest month of summer receives less than 40 mm.
Csb = Warm-summer Mediterranean climate; coldest month averaging above 0 °C (or −3 °C), all months with average temperatures below 22 °C, and at least four months averaging above 10 °C. At least three times as much precipitation in the wettest month of winter as in the driest month of summer, and the driest month of summer receives less than 40 mm.
Dfb = Warm-summer humid continental climate; coldest month averaging below 0 °C (or −3 °C), all months with average temperatures below 22 °C, and at least four months averaging above 10 °C. No significant precipitation difference between seasons

## Sheet: Table S2
Month	Average monthly temperature (°C)	Precipitation (mm)
November	10.225	10.7
December	5.0871	71.1
January	1.52258	18.1
February	7.35	57
March	7.74839	57
April	12.4933	27.1
May	15.8677	61.8
June	20.6233	61.8
July	22.2935	71.6

## Sheet: Table S3
ID accession/plants	Coleoptile: anthocyanin coloration	Plant: growth habit	Frequency of plants with recurved flag leaves	Time of ear emergence	Flag leaf: anthocyanin coloration of auricles	Flag leaf: glaucosity of lower side of leaf blade	Ear: glaucosity	Plant: length	Ear: distribution of awns	Ear: length of awns at tip relative to length of ear	Lower glume: shape of shoulder	Lower glume: width of shoulder	Lower glume: length of beak	Lower glume: curvature of beak	Lower glume: hairiness of external surface	Straw: pith in cross section	Ear: length (excluding awns)	Ear: density	Plant: seasonal type
METD-01/01	NA	3	3	7	3	3	3	3	3	3	2	3	5	3	1	5	5	3	1
METD-01/02	NA	1	3	5	3	3	3	5	3	3	2	3	5	3	1	5	5	3	1
METD-01/03	NA	1	1	5	3	3	3	5	3	3	2	3	5	3	1	5	7	3	1
METD-02/01	NA	1	5	3	2	3	3	7	3	2	4	3	7	5	1	5	7	3	1
METD-02/02	NA	1	3	3	2	3	5	5	3	2	4	3	7	5	1	5	5	3	1
METD-02/03	NA	1	5	5	2	3	5	7	3	2	4	5	5	1	1	5	7	3	1
METD-02/04	1	1	3	5	2	3	5	5	3	2	4	5	5	1	1	5	5	3	1
METD-03/01	1	1	3	5	3	3	5	5	3	2	4	5	5	1	1	5	7	3	1
METD-03/02	1	3	1	5	2	3	3	7	3	2	4	5	5	1	1	5	5	3	1
METD-03/03	1	1	1	3	2	3	3	5	3	2	4	5	5	1	1	5	5	3	1
METD-03/04	1	3	1	5	3	3	5	5	3	2	2	5	5	1	1	5	5	3	1
METD-03/06	7	1	3	5	3	1	3	3	3	2	4	5	5	1	1	5	5	3	1
METD-04/01	7	3	1	5	2	5	5	7	3	2	4	5	5	1	1	5	5	3	1
METD-04/02	7	1	3	3	2	3	5	7	3	2	4	5	5	5	1	5	5	3	1
METD-04/03	5	1	1	3	2	5	5	5	3	3	4	5	5	1	1	5	7	3	1
METD-04/04	5	3	3	5	2	3	3	3	3	2	4	5	5	1	1	5	7	3	1
METD-04/05	NA	1	1	3	2	1	3	7	3	1	4	5	5	1	1	5	7	3	1
METD-05/01	NA	1	1	5	2	1	3	5	3	2	4	5	5	1	1	5	5	3	1
METD-05/02	5	3	3	5	2	3	3	5	3	1	4	5	5	1	1	3	7	3	1
METD-05/03	5	3	1	5	2	1	5	5	3	2	4	5	5	1	1	3	5	3	1
METD-05/04	5	3	3	5	1	3	3	3	3	2	3	3	7	1	1	5	7	3	1
METD-05/05	NA	1	3	3	2	1	3	5	3	2	3	3	7	1	1	5	7	3	1
METD-05/06	5	3	1	3	2	1	1	5	3	2	3	3	7	1	1	5	5	3	1
METD-05/07	1	3	1	3	1	3	3	3	3	2	3	3	7	1	1	5	3	3	1
METD-05/08	NA	1	1	3	2	3	5	5	3	2	3	3	7	1	1	5	5	3	1
METD-06/01	NA	1	1	3	2	1	3	7	4	2	3	3	7	1	1	5	5	3	1
METD-06/02	1	1	1	3	2	1	3	7	4	2	2	3	7	1	1	5	7	3	1
METD-06/04	5	1	3	3	1	3	3	7	4	2	3	3	7	1	1	5	5	3	1
METD-07/01	1	1	1	3	1	1	3	7	4	2	3	7	7	1	1	5	5	3	1
METD-07/02	5	1	3	3	2	3	3	5	4	2	3	7	3	1	1	5	7	3	1
METD-07/03	7	1	3	3	1	1	5	7	4	2	3	7	3	1	1	5	7	3	1
METD-08/01	NA	3	1	5	1	3	5	5	4	2	2	7	3	1	1	5	5	3	1
METD-09/01	NA	3	1	5	1	3	5	5	4	2	2	7	3	1	1	5	7	3	1
METD-09/02	NA	1	5	3	1	3	5	7	4	2	3	7	3	1	1	5	5	3	1
METD-09/03	5	1	1	3	1	1	5	7	4	2	3	7	3	1	1	5	7	3	1
METD-09/04	5	1	3	3	2	1	3	5	4	2	2	5	3	1	1	5	5	3	1
METD-09/05	5	1	5	3	1	1	5	7	4	2	2	7	3	3	1	5	5	3	1
METD-09/06	5	1	7	3	1	3	3	7	4	2	2	7	3	3	1	5	7	3	1
METD-10/01	5	3	5	5	1	3	5	7	3	2	1	3	7	1	1	5	7	3	1
METD-10/02	5	1	3	5	1	3	3	7	3	2	1	3	7	1	1	5	5	3	1
METD-10/03	5	1	7	5	2	1	3	7	3	2	1	3	7	1	1	5	7	3	1
METD-11/01	7	3	5	3	1	3	3	5	3	2	2	1	7	7	1	5	5	3	1
METD-11/02	7	1	3	3	3	3	3	7	3	2	2	1	7	7	1	5	7	3	1
METD-11/03	7	1	3	3	3	3	5	5	3	2	2	1	7	7	1	5	7	3	1
METD-11/04	7	3	5	3	2	1	3	7	3	2	2	1	7	7	1	5	7	3	1
METD-11/05	7	3	5	3	2	3	3	7	3	2	2	1	7	7	1	5	7	3	1
METD-11/06	7	1	5	5	1	3	3	5	3	2	2	1	7	7	1	5	7	3	1
METD-11/07	7	1	3	5	2	3	3	7	3	2	2	1	7	7	1	5	7	3	1
METD-12/01	7	1	7	3	1	1	3	7	3	2	4	3	1	1	1	5	7	3	1
METD-12/02	5	1	1	3	2	3	3	5	3	2	4	1	5	1	1	5	5	3	1
METD-12/03	5	1	3	3	1	3	3	7	3	2	4	1	5	1	1	5	5	3	1
METD-13/01	1	1	3	3	2	3	5	7	3	2	4	1	5	1	1	5	5	3	1
METD-13/02	1	1	3	3	2	5	5	5	3	2	4	1	5	1	1	5	7	3	1
METD-13/03	1	3	3	3	2	3	5	5	3	2	4	1	7	1	1	5	5	3	1
METD-13/04	1	3	3	3	2	3	3	5	3	2	4	1	7	1	1	5	5	3	1
METD-13/05	5	1	7	3	2	1	5	7	3	2	4	1	5	1	1	5	5	3	1
METD-13/06	1	3	3	5	2	1	5	5	3	2	4	3	5	1	1	5	7	3	1
METD-14/01	1	3	3	5	3	3	3	5	3	2	4	3	3	1	1	5	7	3	1
METD-14/02	7	1	3	3	2	3	3	5	3	2	4	5	7	3	1	5	7	3	1
METD-14/03	7	1	5	3	1	3	3	5	3	2	4	5	7	3	1	5	5	3	1
METD-15/01	7	1	7	5	2	3	3	5	3	2	4	5	7	3	1	5	5	3	1
METD-15/02	7	1	5	5	2	3	5	5	3	2	4	5	7	3	1	5	7	3	1
METD-15/03	1	3	7	5	2	3	3	5	3	2	4	5	7	3	1	5	5	3	1
METD-15/04	7	1	3	3	3	3	3	7	3	2	4	5	7	3	1	5	7	3	1
METD-15/05	7	3	3	3	3	3	3	5	3	2	4	5	7	3	1	5	5	3	1
METD-15/06	7	3	1	3	2	3	3	5	3	2	4	5	7	3	1	5	7	3	1
METD-15/07	5	1	1	3	2	1	5	7	3	2	4	5	7	3	1	5	7	3	1
METD-15/08	5	1	1	3	2	3	3	5	3	2	4	5	7	3	1	5	5	3	1
METD-15/09	1	3	1	3	2	3	3	5	3	2	4	5	7	3	1	5	7	3	1
METD-15/10	1	1	1	3	2	3	3	5	3	2	4	7	7	3	1	5	7	3	1
METD-15/11	1	3	1	3	2	3	3	5	3	2	4	7	7	3	1	5	7	3	1
METD-16/01	5	3	1	3	2	1	3	7	3	2	4	7	5	3	1	5	5	3	1
METD-16/02	1	1	3	3	3	3	5	7	3	2	4	7	5	5	1	5	7	3	1
METD-16/03	5	3	5	5	1	3	5	5	3	2	4	7	5	5	1	5	7	3	1
METD-16/04	5	1	5	3	2	3	3	3	3	2	4	7	5	5	1	5	7	3	1
METD-16/05	5	1	3	5	1	3	5	5	3	2	4	7	5	5	1	5	7	3	1
METD-16/06	7	1	3	3	1	5	5	7	3	2	4	7	5	5	1	5	7	3	1
METD-17/01	7	1	3	3	2	3	3	5	3	2	2	7	3	3	1	5	7	3	1
METD-17/03	7	1	1	3	2	1	5	7	3	2	2	7	3	3	1	5	7	3	1
METD-17/04	7	1	3	3	3	3	3	5	3	2	2	7	3	3	1	5	5	3	1
METD-18/01	7	1	1	3	2	3	3	5	3	2	3	7	5	3	1	5	5	3	1
METD-18/02	7	1	1	3	2	1	3	7	3	2	3	7	5	3	1	5	7	3	1
METD-18/03	7	1	1	3	2	3	5	5	3	2	4	1	7	1	1	5	5	3	1
METD-18/04	5	1	1	3	2	3	3	5	3	2	5	1	7	1	1	5	5	3	1
METD-19/01	5	1	1	3	2	1	3	5	3	2	5	1	7	1	1	5	5	3	1
METD-19/02	5	1	3	5	1	3	3	5	3	2	4	3	3	1	1	5	7	3	1
METD-19/03	1	1	1	5	1	3	3	7	3	2	4	3	3	1	1	5	7	3	1
METD-20/01	5	1	3	5	1	1	3	7	3	2	4	3	3	1	1	5	5	3	1
METD-20/02	5	1	5	5	1	1	3	5	3	2	4	3	3	1	1	5	5	3	1
METD-20/03	5	3	3	5	2	3	3	3	3	2	4	3	3	1	1	5	5	3	1
METD-20/05	1	3	3	3	1	3	3	5	3	2	4	3	3	1	1	5	5	3	1
METD-20/06	1	1	3	5	1	3	3	5	3	2	4	5	1	1	1	5	7	3	1
METD-20/08	5	1	3	5	1	1	3	5	3	2	4	5	1	1	1	5	7	3	1
METD-20/09	5	3	3	5	1	1	3	5	3	2	4	5	1	1	1	5	7	3	1
METD-21/01	5	3	1	3	2	1	3	3	3	2	4	3	3	1	1	5	5	3	1
METD-21/02	5	1	3	3	1	1	3	5	3	2	4	3	3	1	1	5	5	3	1
METD-21/03	5	3	3	5	2	3	3	5	3	2	4	3	3	1	1	5	5	3	1
METD-21/04	5	1	1	5	2	3	3	5	3	2	4	3	3	1	1	5	5	3	1
METD-21/05	5	3	1	5	1	3	3	5	3	2	4	3	1	1	1	5	7	3	1
METD-22/01	5	1	1	3	1	3	3	5	3	2	4	3	1	1	1	5	7	3	1
METD-23/01	5	3	5	5	2	3	3	3	3	2	2	3	5	1	1	5	7	3	1
METD-23/02	5	1	5	3	1	3	3	5	3	2	2	3	5	1	1	5	7	3	1
METD-23/03	5	1	5	3	1	3	5	5	3	2	2	3	5	1	1	5	7	3	1
METD-24/01	5	1	5	3	1	3	3	5	3	2	2	1	5	1	1	5	5	3	1
METD-24/02	5	1	5	3	1	3	3	5	3	2	2	5	5	1	1	5	7	3	1
METD-24/03	5	1	5	5	1	3	3	5	3	2	2	5	5	1	1	5	7	3	1
METD-24/04	5	1	7	5	1	3	3	3	3	2	2	5	5	1	1	5	7	3	1
METD-24/05	5	1	7	5	1	3	3	5	3	2	2	5	5	1	1	5	5	3	1
METD-24/06	5	1	7	5	2	3	5	3	3	2	2	5	5	1	1	5	7	3	1
METD-24/07	5	1	5	5	2	3	5	3	3	2	2	5	5	1	1	5	5	3	1
METD-24/08	1	1	1	5	2	3	5	7	3	2	2	5	5	1	1	5	5	3	1
METD-25/01	5	1	1	3	1	3	3	5	3	2	2	5	5	1	1	5	5	3	1
METD-25/02	5	1	1	3	2	3	3	7	3	2	2	3	5	1	1	5	5	3	1
METD-25/03	5	1	3	3	2	3	5	7	3	2	2	3	5	1	1	5	5	3	1
METD-25/04	5	1	3	3	2	1	5	7	3	2	2	3	5	1	1	5	5	3	1
METD-25/05	5	1	1	3	1	3	3	7	3	2	2	7	5	1	1	5	5	3	1
METD-25/06	5	1	3	3	2	3	5	5	3	2	2	7	5	1	1	5	5	3	1
METD-25/07	5	1	1	3	2	3	3	7	3	2	2	5	5	1	1	5	5	3	1
METD-25/08	5	3	1	3	2	3	3	7	3	2	2	5	5	1	1	5	7	3	1
METD-25/09	5	3	3	5	2	3	3	7	3	2	2	5	5	1	1	5	5	3	1
METD-26/01	NA	1	1	3	2	3	3	3	3	2	2	3	7	1	1	5	5	3	1
METD-26/02	NA	1	3	3	2	5	5	5	3	2	2	3	7	1	1	5	5	3	1
METD-26/03	NA	1	1	3	2	3	5	5	3	2	2	3	7	1	1	5	5	3	1
METD-26/04	NA	3	1	3	2	3	5	5	3	2	2	3	7	1	1	5	5	3	1
METD-26/05	7	1	1	5	2	3	5	7	3	2	2	3	7	1	1	5	5	3	1
METD-26/06	7	1	3	3	2	3	5	5	3	2	2	3	7	1	1	5	5	3	1
METD-27/01	NA	3	1	7	2	1	3	3	3	2	2	3	7	1	1	5	5	3	1
METD-27/02	5	3	3	7	2	1	3	3	3	2	2	3	7	1	1	5	5	3	1
METD-28/01	1	1	3	5	2	1	3	5	3	2	2	3	7	1	1	5	7	3	1
METD-28/02	1	1	5	5	2	3	3	5	3	2	2	3	7	1	1	5	5	3	1
METD-28/03	1	1	1	5	1	3	3	5	3	2	2	3	7	1	1	5	7	3	1
METD-28/04	1	3	1	5	2	3	3	5	3	2	2	3	7	1	1	5	7	3	1
METD-28/05	1	3	5	5	1	1	3	5	3	2	2	3	7	5	1	5	5	3	1
METD-28/06	1	1	3	5	1	1	3	5	3	2	2	3	7	5	1	5	5	3	1
METD-28/07	1	1	1	5	2	3	3	5	3	2	2	3	7	5	1	5	7	3	1
METD-28/08	1	3	1	5	2	5	5	5	3	2	2	5	7	5	1	5	7	3	1
METD-29/01	1	1	5	5	2	3	5	5	3	2	2	3	7	1	1	5	7	3	1
METD-30/01	1	1	1	5	2	3	3	7	3	2	2	3	7	3	1	5	7	3	1
METD-30/02	5	1	3	5	1	3	3	7	3	2	2	3	7	3	1	5	7	3	1
METD-30/03	5	1	1	5	1	3	5	7	3	2	2	3	7	3	1	5	7	3	1
METD-30/04	5	1	1	5	2	3	3	7	3	2	2	3	7	3	1	5	7	3	1
METD-30/06	1	1	3	5	1	3	5	7	3	2	2	3	7	3	1	5	7	3	1
METD-31/01	7	3	5	5	2	3	3	5	3	2	2	1	7	1	1	5	7	3	1
METD-31/02	7	3	3	5	2	3	3	7	3	2	2	1	7	1	1	5	7	3	1
METD-31/03	7	1	3	5	2	3	3	7	3	2	2	1	7	1	1	5	7	3	1
METD-31/04	5	1	3	5	1	3	3	7	3	2	2	1	7	1	1	5	7	3	1
METD-31/05	7	1	3	5	1	3	5	7	3	2	2	1	7	1	1	5	7	3	1
METD-31/06	5	1	3	5	1	3	3	7	3	2	2	3	7	1	1	5	7	3	1
METD-32/01	5	3	5	5	2	3	3	5	3	2	2	3	7	1	1	5	7	3	1
METD-32/02	5	3	5	5	2	1	3	5	3	2	2	3	7	1	1	5	7	3	1
METD-32/03	5	1	5	5	2	1	3	5	3	2	2	3	7	1	1	5	5	3	1
METD-32/04	5	1	7	5	2	1	3	5	3	2	2	3	7	1	1	5	7	3	1
METD-33/01	7	1	7	3	1	1	3	5	3	2	2	3	7	5	1	5	7	3	1
METD-33/02	7	1	5	5	1	1	3	5	3	2	2	3	7	3	1	5	7	3	1
METD-33/03	7	3	7	5	1	3	3	5	3	2	2	3	7	1	1	5	7	3	1
METD-33/04	7	3	5	5	1	3	3	3	3	2	2	3	7	1	1	5	5	3	1
METD-33/05	7	1	3	5	1	3	3	5	3	2	2	3	7	1	1	5	7	3	1
METD-34/01	7	1	3	5	2	3	3	3	3	2	2	3	7	3	1	5	7	3	1
METD-34/02	7	3	5	5	3	3	3	3	3	2	2	3	7	3	1	5	5	3	1
METD-34/03	1	1	3	7	3	3	3	3	3	2	2	3	7	3	1	5	7	3	1
METD-34/05	1	3	5	7	3	3	3	3	3	2	2	3	7	3	1	5	7	3	1
METD-35/01	7	1	3	5	1	3	3	5	3	2	2	5	5	1	1	5	7	3	1
METD-35/02	7	3	1	5	1	3	3	5	3	2	2	5	5	1	1	5	5	3	1
METD-35/03	7	1	3	5	1	3	3	7	3	2	2	3	3	1	1	5	5	3	1
METD-35/04	7	1	1	3	1	3	3	7	3	2	2	3	3	1	1	3	5	3	1
METD-36/01	7	1	1	5	1	3	3	7	3	2	2	3	3	1	1	3	5	3	1
METD-36/02	1	1	3	5	1	3	3	7	3	2	2	3	3	1	1	5	5	3	1
METD-37/01	7	1	1	3	2	3	5	5	3	2	2	3	3	1	1	5	5	3	1
METD-37/02	7	1	3	3	2	3	3	7	3	2	2	5	3	1	1	5	5	3	1
METD-37/03	7	3	3	5	2	3	3	7	3	2	2	7	3	1	1	3	5	3	1
METD-37/04	7	1	1	3	2	3	3	7	3	2	2	7	1	1	1	5	7	3	1
METD-37/05	7	3	1	5	3	5	3	7	3	2	2	3	7	1	1	5	5	3	1
METD-37/07	7	3	3	5	2	3	3	5	3	2	2	3	7	1	1	5	7	3	1
METD-37/08	7	1	5	3	3	3	3	7	3	2	2	3	7	1	1	5	5	3	1
METD-38/01	7	3	3	3	2	5	5	5	3	2	2	5	5	1	1	5	7	3	1
METD-38/02	7	1	1	3	2	3	3	5	3	2	2	3	7	3	1	5	5	3	1
METD-38/03	7	1	1	3	2	3	5	5	3	2	2	3	7	3	1	5	5	3	1
METD-38/04	7	1	1	3	2	5	5	5	3	2	2	5	3	3	1	5	7	3	1
METD-38/05	7	1	1	3	3	3	5	5	3	2	2	3	5	3	1	3	7	3	1
METD-38/06	7	1	7	3	2	1	3	5	3	2	2	3	5	3	1	5	7	3	1
METD-39/01	7	3	7	3	2	3	5	5	3	2	3	3	5	3	1	5	5	3	1
METD-39/03	7	1	1	3	2	5	5	5	3	2	2	5	5	5	1	5	5	3	1
METD-39/04	7	1	5	3	2	5	5	7	3	2	2	5	5	5	1	5	5	3	1
METD-40/01	7	1	3	3	2	3	5	7	3	2	2	5	5	7	1	3	5	3	1
METD-40/02	7	1	5	3	1	3	5	7	3	2	2	3	7	7	1	3	5	3	1
METD-40/03	7	1	3	3	1	3	5	7	3	2	2	5	5	7	1	5	5	3	1
METD-40/04	NA	1	3	3	2	3	5	5	3	2	2	5	5	7	1	5	5	3	1
METD-41/01	NA	1	1	5	1	1	3	3	3	2	3	3	7	3	1	3	7	3	1
METD-41/02	5	1	1	3	2	3	3	7	3	2	3	3	7	3	1	5	7	3	1
METD-41/03	7	1	1	3	2	3	3	5	3	2	3	3	7	5	1	5	5	3	1
METD-41/04	7	1	3	3	1	3	3	5	3	2	3	3	7	1	1	5	5	3	1
METD-42/01	7	1	3	3	1	3	3	7	3	2	3	3	7	3	1	5	5	3	1
METD-42/02	7	1	1	3	2	3	3	7	3	2	3	3	7	3	1	5	5	3	1
METD-42/03	7	1	1	3	2	3	3	7	3	2	3	3	7	3	1	5	7	3	1
METD-42/04	7	1	1	3	2	3	5	5	3	2	2	5	5	3	1	5	7	3	1
METD-42/05	7	1	1	5	2	3	3	7	3	2	2	5	5	3	1	5	5	3	1
METD-42/06	7	1	3	5	2	1	3	5	3	2	2	3	7	3	1	5	7	3	1
METD-42/07	7	1	1	3	2	1	3	5	3	2	2	3	7	3	1	5	5	3	1
METD-42/08	7	1	1	3	2	1	3	5	3	2	2	5	5	3	1	5	7	3	1
METD-42/09	7	1	5	5	2	3	3	5	3	2	2	5	5	3	1	3	5	3	1
METD-42/10	7	1	3	3	2	3	3	5	3	2	2	5	5	3	1	5	5	3	1
METD-43/01	7	1	5	3	2	3	3	5	3	2	2	5	5	3	1	5	5	5	1
METD-43/02	7	1	3	3	3	3	3	5	3	2	2	5	5	3	1	5	5	5	1
METD-43/03	7	1	3	3	3	3	5	5	3	2	2	5	7	3	1	5	7	5	1
METD-43/04	7	1	3	3	3	3	3	5	3	2	2	5	7	3	1	5	7	5	1
METD-43/05	7	1	3	3	2	3	5	5	3	2	2	5	7	3	1	3	7	5	1
METD-43/06	7	1	5	5	3	3	3	7	3	2	2	5	7	3	1	5	7	5	1
METD-43/07	7	1	7	5	2	3	3	7	3	2	2	5	7	3	1	5	7	5	1
METD-43/08	7	1	7	3	2	3	3	5	3	2	2	7	7	3	1	5	5	5	1
METD-44/01	7	1	5	5	2	5	5	5	3	2	2	3	7	3	1	5	5	3	1
METD-44/03	7	1	5	5	2	3	3	3	3	2	2	3	7	3	1	5	5	3	1
METD-44/04	7	1	3	5	2	3	3	5	3	2	2	3	7	3	1	5	5	3	1
METD-44/05	7	1	3	5	1	3	3	5	3	2	2	3	7	3	1	5	5	3	1
METD-44/06	7	1	3	5	1	3	3	5	3	2	3	5	5	3	1	5	7	3	1
METD-45/01	NA	3	3	7	2	3	3	3	3	2	3	5	7	5	1	5	7	5	1
METD-45/02	NA	1	5	7	2	3	3	7	3	2	3	5	7	5	1	5	5	5	1
METD-45/03	NA	3	3	5	2	3	3	5	3	2	4	3	5	7	1	5	5	5	1
METD-45/04	NA	1	5	5	2	3	3	5	3	2	4	3	5	7	1	5	7	5	1
METD-45/05	NA	1	3	5	2	5	5	5	3	2	4	3	5	7	1	5	7	5	1
METD-45/06	NA	1	3	3	1	5	5	5	3	2	4	5	5	5	7	5	7	5	1
METD-46/01	7	1	1	3	3	5	5	7	3	2	4	1	5	1	1	5	7	3	1
METD-46/02	7	1	1	3	3	3	5	5	3	2	3	5	5	1	1	5	5	3	1
METD-46/03	7	1	3	3	3	3	3	5	3	2	3	5	5	1	1	5	7	3	1
METD-46/04	7	1	1	3	2	3	5	5	3	2	3	5	5	1	1	5	5	3	1
METD-46/05	7	1	3	3	2	3	3	5	3	2	3	5	5	1	1	3	5	3	1
METD-47/01	7	1	1	3	2	3	3	5	3	2	3	5	3	3	1	5	5	3	1
METD-47/02	7	1	1	3	1	3	3	5	3	2	3	5	5	1	1	5	5	3	1
METD-47/03	7	1	1	3	1	5	3	5	3	2	3	5	5	1	1	5	5	3	1
METD-47/04	7	1	1	3	1	5	5	5	3	2	3	5	5	1	1	5	5	3	1
METD-47/05	7	1	1	3	2	5	5	5	3	2	3	5	5	1	1	5	5	3	1
METD-48/01	7	1	3	5	2	3	3	7	3	2	3	5	5	1	1	5	5	3	1
METD-48/02	7	3	5	5	1	3	5	3	3	2	3	5	5	1	1	3	7	3	1
METD-48/03	7	1	5	7	2	3	5	7	3	2	3	3	1	3	1	3	7	3	1
METD-48/04	7	3	3	7	1	3	5	3	3	2	3	3	5	1	1	3	7	3	1
METD-49/01	7	1	3	5	1	5	3	3	3	2	3	1	5	1	1	5	7	3	1
METD-49/02	7	1	5	3	1	3	3	5	3	2	3	1	5	1	1	5	7	3	1
METD-49/03	7	1	1	3	1	3	5	5	3	2	3	3	5	1	1	5	7	3	1
METD-49/04	7	1	1	3	1	5	5	5	3	2	3	3	5	1	1	5	7	3	1
METD-49/05	7	1	3	3	1	5	5	5	3	2	3	3	5	1	1	5	7	3	1
METD-49/06	7	1	3	5	1	5	5	5	3	2	3	3	5	1	1	5	7	3	1
METD-49/07	7	1	3	5	1	5	5	5	3	2	3	3	5	1	1	5	7	3	1
METD-50/01	7	1	1	5	1	3	3	5	3	2	3	3	5	1	1	5	7	3	1
METD-50/02	7	1	3	5	1	5	5	3	3	2	3	3	5	1	1	5	5	3	1
METD-50/03	7	1	1	5	2	5	5	5	3	2	3	3	5	1	1	5	7	3	1
METD-50/04	7	1	1	3	1	3	3	3	3	2	3	3	5	1	1	5	7	3	1
METD-50/05	7	1	1	3	1	3	5	3	3	2	3	3	5	1	1	5	5	3	1
METD-50/06	7	1	1	3	1	3	3	3	3	2	3	3	5	1	1	5	5	3	1
METD-50/07	7	1	3	3	1	3	3	3	3	2	3	3	5	1	1	5	7	3	1
METD-51/01	7	1	3	5	1	3	5	5	3	2	2	7	5	3	1	3	7	3	1
METD-52/01	NA	1	3	7	2	3	5	1	3	2	2	7	5	1	1	5	7	3	1
METD-52/02	NA	1	3	5	2	3	5	3	3	2	2	7	5	1	1	5	5	3	1
METD-53/01	7	1	1	5	2	3	5	5	3	2	2	7	5	1	1	3	7	3	1
METD-53/02	7	3	1	5	3	3	5	3	3	2	2	7	5	1	1	3	7	3	1
METD-53/03	7	3	1	5	4	3	5	3	3	2	2	7	5	1	1	3	7	3	1
METD-53/04	7	3	1	5	3	5	5	7	3	2	2	7	5	1	1	3	7	3	1
METD-53/05	NA	3	1	5	3	3	5	7	3	2	2	7	5	1	1	5	7	3	1
METD-54/01	NA	1	1	5	2	3	3	3	3	2	2	7	5	1	1	5	7	3	1
METD-55/01	NA	1	3	3	2	3	5	5	3	2	2	3	5	1	1	5	7	3	1
METD-55/02	NA	1	1	3	2	3	5	5	3	2	2	3	5	1	1	5	5	3	1
METD-55/03	NA	1	1	3	2	3	3	5	3	2	2	3	5	1	1	5	5	3	1
METD-55/04	NA	1	3	3	2	3	3	5	3	2	2	3	5	1	1	5	5	3	1
METD-56/01	7	1	7	5	2	3	5	3	3	2	2	3	5	1	1	5	7	3	1
METD-57/01	NA	3	3	5	4	3	5	3	3	2	2	7	3	1	1	5	5	3	1
METD-57/03	NA	3	3	5	4	5	5	3	3	2	2	7	3	1	1	5	5	3	1
METD-57/04	7	3	3	5	4	3	5	5	3	2	2	7	3	1	1	5	7	3	1
METD-57/05	7	1	3	5	4	5	5	5	3	2	2	7	3	1	1	5	5	3	1
METD-58/01	NA	3	1	3	3	3	5	3	3	2	2	5	3	1	1	5	5	3	1
METD-58/02	NA	1	1	5	2	3	3	5	3	2	2	5	3	1	1	5	5	3	1
METD-58/03	NA	3	3	5	2	3	3	3	3	2	2	5	3	1	1	5	7	3	1
METD-58/04	1	3	1	3	1	3	5	7	3	2	2	3	5	1	1	5	5	3	1
METD-58/05	1	1	1	3	2	3	5	7	3	2	2	5	1	1	1	5	7	3	1
METD-58/06	1	1	1	3	2	3	5	5	3	2	2	5	1	1	1	5	5	3	1
METD-58/08	1	1	3	3	2	3	5	5	3	2	2	5	1	1	1	5	5	3	1
METD-58/09	1	1	1	3	2	3	5	5	3	2	2	5	1	1	1	5	7	3	1
METD-58/10	5	1	1	3	2	3	5	5	3	2	2	5	1	1	1	5	5	3	1
METD-59/01	7	1	1	3	2	3	3	7	3	2	3	5	1	1	1	3	5	3	1
METD-59/02	7	3	1	3	2	3	5	5	3	2	3	5	1	1	1	5	5	3	1
METD-59/03	7	1	5	3	2	3	5	3	3	2	3	5	1	1	1	5	5	3	1
METD-59/04	7	3	1	3	2	1	3	3	3	2	3	5	1	3	1	5	5	3	1
METD-59/05	7	1	3	3	2	3	3	3	3	2	3	7	1	3	1	5	5	3	1
METD-59/06	7	1	3	3	1	3	3	5	4	2	3	7	1	3	1	3	5	3	1
METD-59/07	NA	1	3	3	2	3	3	3	4	2	3	7	1	3	1	3	5	3	1
METD-59/08	NA	1	5	3	2	3	3	5	4	2	3	7	1	3	1	3	5	3	1
METD-60/01	7	1	1	3	3	3	5	5	4	2	3	5	1	3	1	5	7	3	1
METD-60/02	7	1	1	5	3	3	3	3	4	2	3	5	1	3	1	5	5	3	1
METD-61/01	NA	1	3	3	3	3	5	5	4	2	3	5	3	3	1	5	5	3	1
METD-62/01	7	1	5	3	2	3	5	5	4	2	3	7	3	3	1	5	7	3	1
METD-62/02	NA	1	5	3	2	3	3	3	4	2	3	7	3	3	1	5	5	3	1
METD-62/03	NA	1	3	3	3	3	3	3	4	2	3	7	3	3	1	5	5	3	1
METD-63/01	7	1	3	3	2	5	5	3	4	2	3	7	5	3	1	5	5	3	1
METD-63/02	7	1	1	5	3	5	3	3	4	2	3	7	5	3	1	5	5	3	1
METD-64/01	7	3	3	5	2	3	3	5	4	2	3	7	5	3	1	5	5	3	1
METD-64/02	7	1	5	5	2	3	5	3	4	2	3	7	5	3	1	5	5	3	1
METD-64/03	7	3	3	5	1	3	5	3	4	2	3	5	5	3	1	5	5	3	1
METD-64/04	7	1	5	5	1	3	3	5	4	2	3	5	5	3	1	5	7	3	1
METD-65/01	7	1	3	5	2	3	3	3	4	2	3	5	3	3	1	5	5	3	1
METD-65/02	7	1	5	5	2	3	3	5	4	2	3	5	3	3	1	5	5	3	1
METD-65/03	7	1	3	5	2	3	3	5	4	2	3	7	3	3	1	3	5	3	1
METD-65/04	7	1	5	3	2	3	3	5	4	2	3	7	3	3	1	5	7	3	1
METD-65/05	7	1	3	3	2	3	3	3	4	2	3	7	3	3	1	5	5	3	1
METD-65/06	7	1	5	5	1	3	5	5	4	2	3	7	3	3	1	3	5	3	1
METD-65/07	7	1	5	5	1	3	3	5	4	2	3	7	3	3	1	3	5	3	1
METD-65/08	7	1	5	5	1	3	3	3	4	2	3	7	3	3	1	3	7	3	1
METD-66/01	7	1	3	3	2	3	3	5	4	2	3	7	3	3	1	3	7	3	1
METD-66/02	7	1	3	3	1	3	5	5	4	2	3	7	3	3	1	5	7	3	1
METD-66/03	7	1	1	3	2	3	3	3	4	2	3	7	3	3	1	5	5	3	1
METD-66/04	7	1	3	5	2	3	5	5	4	2	3	7	3	3	1	5	7	3	1
METD-67/01	7	1	5	5	2	3	3	5	4	2	4	5	7	3	1	5	7	3	1
METD-67/02	7	1	3	5	2	3	3	5	4	2	4	5	7	3	1	5	5	3	1
METD-67/03	7	1	5	5	2	3	3	5	4	2	4	5	7	5	1	5	7	3	1
METD-67/04	7	3	5	5	2	3	3	5	4	2	4	5	7	1	1	5	5	3	1
METD-67/05	7	3	5	5	2	5	5	5	4	2	4	5	7	1	1	5	5	3	1
METD-67/06	7	1	1	5	2	3	3	5	4	2	4	5	7	1	1	5	5	3	1
METD-67/07	7	3	3	5	2	3	3	5	4	2	4	5	7	1	1	5	5	3	1
METD-68/01	7	1	3	5	2	3	1	5	4	2	4	7	7	3	1	5	7	3	1
METD-68/02	7	1	1	3	2	3	5	5	4	1	3	5	5	1	1	5	5	3	1
METD-68/03	7	3	5	3	2	3	5	5	4	2	3	5	5	1	1	5	5	3	1
METD-68/04	7	1	3	5	2	5	5	3	4	2	3	5	5	5	1	5	5	3	1
METD-68/06	7	1	3	5	2	3	5	3	4	2	3	5	5	1	1	5	5	3	1
METD-69/01	7	1	1	5	2	3	5	5	4	2	4	5	3	1	1	5	7	3	1
METD-70/01	1	1	1	3	2	3	3	5	4	2	1	3	1	1	1	5	5	3	1
METD-70/02	7	1	1	3	4	3	3	5	4	2	1	3	3	1	1	5	7	3	1
METD-70/03	7	1	3	3	1	3	3	5	4	2	1	7	3	1	1	5	7	3	1
METD-70/04	1	1	1	3	2	3	3	5	4	2	1	7	3	1	1	5	7	3	1
METD-70/05	NA	1	3	3	3	3	3	5	4	2	1	7	3	1	1	5	5	3	1
METD-70/06	7	1	3	3	3	3	3	7	4	2	1	7	3	1	1	5	5	3	1
METD-71/01	7	1	3	3	2	3	5	3	4	2	4	3	1	1	1	5	5	3	1
METD-71/02	NA	1	3	3	2	3	3	5	4	2	4	3	1	1	1	5	5	3	1
METD-71/03	NA	1	5	3	1	3	5	5	4	2	4	3	1	1	1	5	5	3	1
METD-71/04	NA	1	3	3	1	3	5	7	4	2	4	3	3	1	1	5	5	3	1
METD-71/05	7	1	5	3	2	3	5	5	4	2	4	3	3	1	1	3	5	3	1
METD-72/01	7	1	3	3	2	5	5	5	4	3	4	3	3	1	1	3	5	3	1
METD-72/02	7	1	3	5	2	5	5	5	4	3	4	3	3	1	1	3	5	3	1
METD-72/03	7	1	1	3	3	5	5	5	4	3	4	3	3	1	1	3	5	3	1
METD-72/04	7	1	1	3	2	3	5	5	4	3	4	3	3	1	1	3	5	3	1
METD-72/05	7	3	3	3	2	3	5	3	4	3	4	3	3	1	1	5	5	3	1
METD-72/06	7	1	3	3	2	3	3	3	4	3	4	3	3	1	1	5	5	3	1
METD-72/08	7	1	3	3	1	3	3	3	4	3	4	3	3	1	1	5	5	3	1
METD-72/09	7	1	3	5	1	5	5	5	4	3	4	3	3	1	1	5	5	3	1
METD-72/10	7	1	3	5	1	5	5	3	4	3	4	3	3	1	1	5	5	3	1
METD-73/01	7	3	3	7	2	3	5	5	4	2	3	3	3	1	1	5	5	3	1
METD-73/02	7	1	3	7	2	3	5	5	4	2	3	3	3	1	1	5	5	3	1
METD-74/01	7	1	1	7	2	3	5	5	4	3	3	3	3	1	1	3	7	3	1
METD-74/02	7	1	3	5	2	3	3	5	4	3	3	5	3	3	1	5	5	3	1
METD-75/01	7	3	3	7	1	3	5	3	4	3	3	5	3	1	1	5	5	3	1
METD-75/02	NA	3	3	7	2	3	5	5	4	3	3	5	3	1	1	5	7	3	1
METD-75/03	7	3	3	5	2	3	5	3	4	3	3	3	5	1	1	5	5	3	1
METD-75/04	7	1	3	5	2	3	5	5	4	3	3	3	5	1	1	5	5	3	1
METD-75/05	7	1	3	5	2	5	5	5	4	3	3	3	5	1	1	5	5	3	1
METD-75/06	7	1	3	5	1	3	3	5	4	3	3	5	3	1	1	5	5	3	1
METD-75/07	7	1	3	5	2	3	3	5	4	3	3	5	3	1	1	5	5	3	1
METD-76/01	7	1	1	3	2	3	5	5	4	2	3	3	5	3	1	5	5	3	1
METD-76/02	7	1	1	3	2	3	5	5	4	2	3	3	5	3	1	3	7	3	1
METD-77/01	7	1	3	5	2	5	5	3	4	2	4	5	7	1	1	5	5	3	1
METD-78/01	7	1	3	5	2	3	3	3	4	2	3	3	1	1	1	5	5	3	1
METD-78/02	7	1	1	5	2	3	5	3	4	2	3	3	1	1	1	5	5	3	1
METD-78/03	7	1	3	5	2	5	5	5	4	2	3	3	1	1	1	5	5	3	1
METD-79/01	7	1	3	5	2	3	5	3	4	3	3	3	3	1	1	5	5	3	1
METD-79/02	NA	1	3	5	2	3	5	3	4	3	4	3	5	1	1	3	5	3	1
METD-79/03	7	1	3	5	2	5	5	3	4	3	4	5	5	1	1	5	5	3	1
METD-79/04	7	1	3	5	2	3	5	5	4	3	4	5	5	1	1	5	5	3	1
METD-79/05	7	1	1	3	2	5	5	3	4	3	4	5	5	1	1	5	7	3	1
METD-79/06	7	1	1	5	2	3	5	3	4	3	4	7	1	1	1	5	5	3	1
METD-79/07	7	1	1	5	2	3	3	3	4	3	4	7	1	1	1	3	5	3	1
METD-79/08	7	1	3	3	2	3	3	3	4	3	3	7	3	5	1	5	5	3	1
METD-79/09	7	1	3	5	2	3	3	3	4	2	3	3	3	1	1	5	7	3	1
METD-80/01	7	1	5	5	3	3	3	5	4	2	5	5	7	1	1	3	5	3	1
METD-80/02	7	1	1	5	3	3	3	5	4	2	5	7	5	1	1	5	5	3	1
METD-80/03	7	1	3	5	3	1	3	5	4	2	5	7	5	1	1	3	5	3	1
METD-80/04	7	1	5	5	3	1	3	3	4	2	5	7	5	1	1	5	5	3	1

## Sheet: Table S4
Table S3. UPOV descriptors and grades for each descriptor
Grade of UPOV descriptors	1	3	5	7	9
Coleoptile: anthocyanin coloration	absent or very weak	weak	medium	strong	very strong
Plant: growth habit	erect	semi erect	intermidiate	semi prostrate	prostrate
Frequency of plants with recurved flag leaves	absent or very low	low	medium	high	very high
Time of ear emergence		early	medium	late
Flag leaf: anthocyanin coloration of auricles	absent or very weak (1)	weak (2)	medium (3)	strong (4)	very strong (5)
Flag leaf: glaucosity of lower side of leaf blade	absent or very weak	weak	medium	strong
Ear: glaucosity	absent or very weak	weak	medium	strong
Plant: length	very short	short	medium	long
Ear: distribution of awns	awneless (1)	tip awned (2)	half awned (3)	fully awned (4)
Ear: length of awns at tip relative to length of ear		shorter (1)	equal (2)	longer (3)
Lower glume: shape of shoulder	sloping (1)	rounded (2)	straight (3)	elevated (4)	elevated with 2nd beak (5)
Lower glume: width of shoulder	very narrow	narrow	medium	broad
Lower glume: length of beak	very short	short	medium	long
Lower glume: curvature of beak	absent	weak	moderate	strong
Lower glume:hairiness of external surface	absent				present
Straw: pith in cross section		thin	medium	thick
Ear: length (excluding awns)		short	medium	long
Ear: density		lax	medium	dense
Plant: seasonal type	winter type (1)	alternative type (2)	spring type (3)
